# Supplementary material for: Fibroblasts from bank voles inhabiting Chernobyl have increased resistance against oxidative and DNA stresses
Source: PubMed Central journal article supplement (PMC6114495; doi:10.1186/s12860-018-0169-9), 2018-08-29

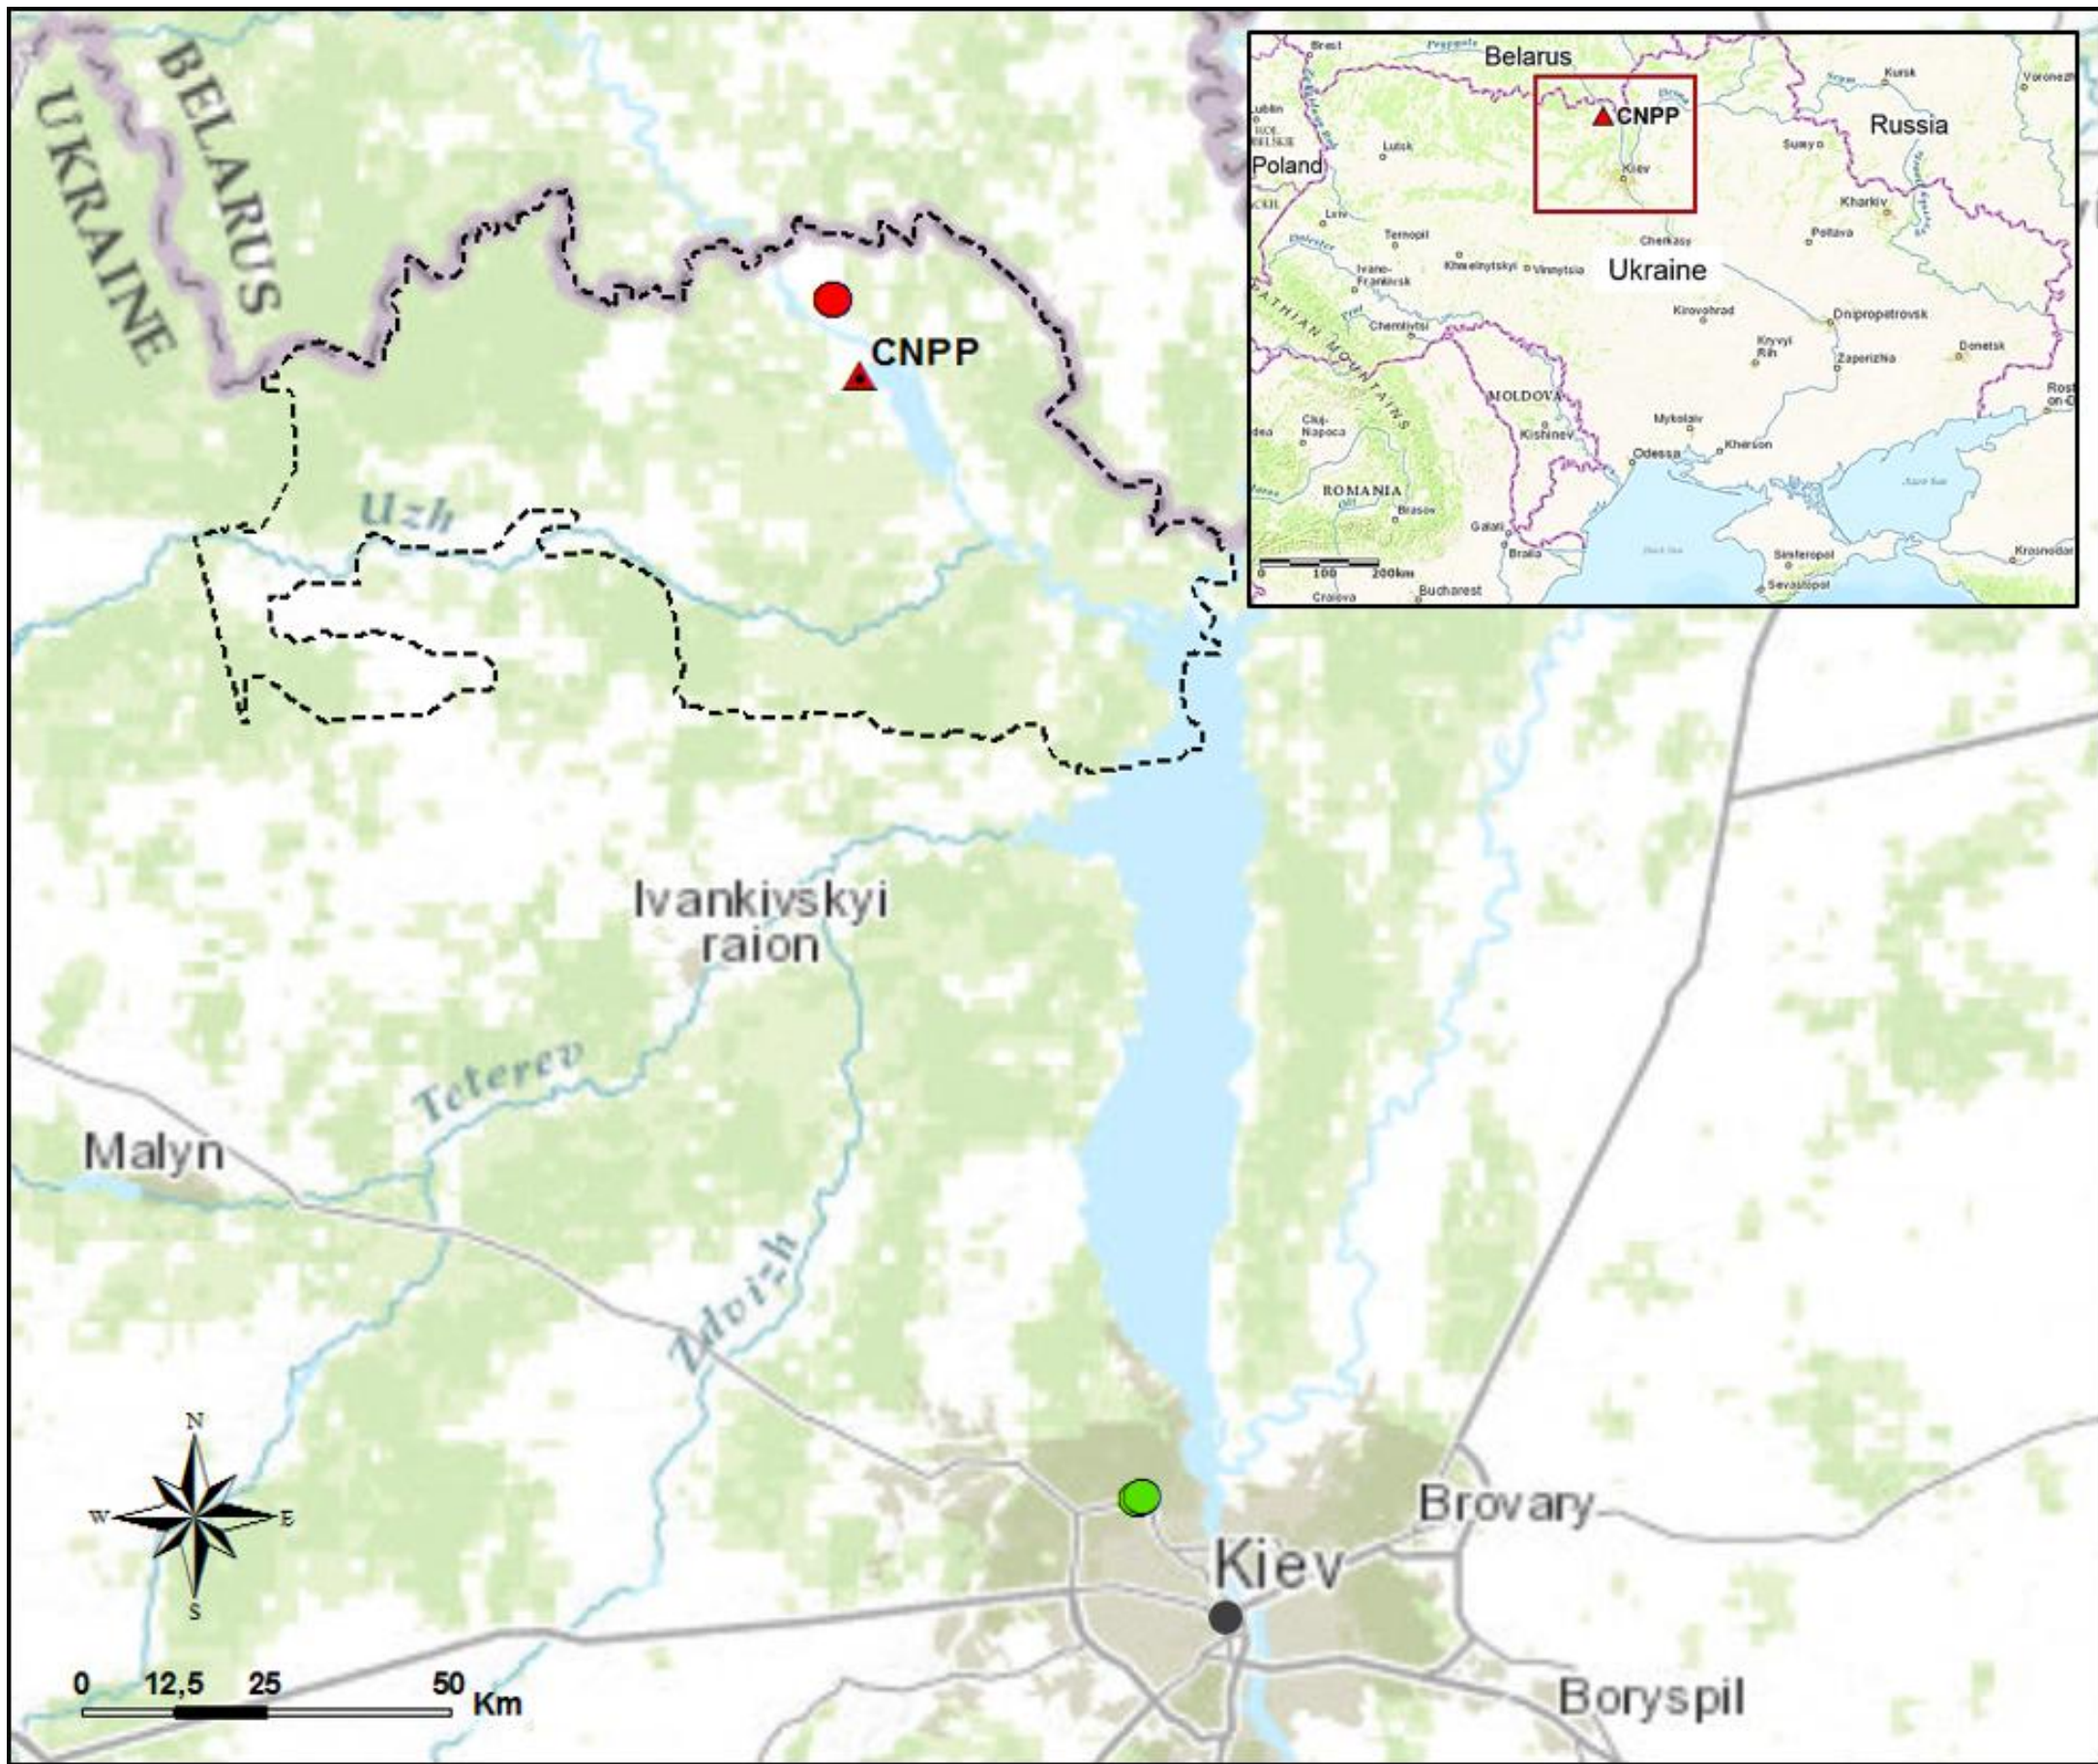

Supplement: 12860_2018_169_MOESM4_ESM.pdf [file 12860_2018_169_MOESM4_ESM.pdf]
